# Supplementary material for: Phage-Host Prediction Using a Computational Tool Coupled with 16S rRNA Gene Amplicon Sequencing
Source: MDPI journal article supplement (doi:10.3390/v15010076), 2022-12-27
Supplement: s1 [file s1]

**Table S1.** Processing report of reads generated from 16S rRNA sequencing in the sediment and water samples of the 7 stations (S1-S7). Each station is represented by triplicates.

| Sample type | Stations | Input reads | Filtered | Denoised | Merged | Nonchimeric | Final_retained |
|-------------|----------|-------------|----------|----------|--------|-------------|----------------|
| SEDIMENT    | S1       | 92591       | 45953    | 44154    | 39870  | 38421       | 41.5           |
|             |          | 113798      | 56069    | 53690    | 47146  | 45599       | 40.1           |
|             |          | 91475       | 45422    | 43217    | 38049  | 36399       | 39.8           |
|             | S2       | 94271       | 46912    | 44406    | 38263  | 36659       | 38.8           |
|             |          | 78631       | 39643    | 37349    | 32302  | 31071       | 39.5           |
|             |          | 48920       | 24610    | 22794    | 18513  | 17520       | 35.8           |
|             | S3       | 82901       | 65842    | 62938    | 56002  | 53939       | 65.1           |
|             |          | 75430       | 59171    | 56067    | 48357  | 46311       | 61.4           |
|             |          | 126307      | 98435    | 93261    | 78714  | 75252       | 59.6           |
|             | S4       | 157408      | 123501   | 113300   | 90291  | 85943       | 54.6           |
|             |          | 83619       | 41616    | 37146    | 27964  | 26433       | 31.6           |
|             |          | 59865       | 29268    | 25624    | 17842  | 16886       | 28.2           |
|             | S5       | 44439       | 22375    | 20916    | 17967  | 17046       | 38.3           |
|             |          | 34598       | 17422    | 16207    | 13629  | 12992       | 37.5           |
|             |          | 41391       | 21200    | 19695    | 16530  | 15520       | 37.5           |
|             | S6       | 33066       | 16557    | 13727    | 9158   | 8655        | 26.2           |
|             |          | 66536       | 33497    | 29354    | 21017  | 20042       | 30.1           |
|             |          | 79482       | 39178    | 35022    | 26166  | 25119       | 31.6           |
|             | S7       | 76806       | 38913    | 34243    | 25108  | 23769       | 30.9           |
|             |          | 76945       | 38716    | 34093    | 24771  | 23448       | 30.5           |
|             |          | 83179       | 42451    | 37240    | 28041  | 26412       | 31.7           |
| WATER       | S1       | 165308      | 33418    | 31764    | 27522  | 26562       | 40.7           |
|             |          | 70413       | 37147    | 35642    | 31665  | 30531       | 43.3           |
|             |          | 56959       | 29776    | 28853    | 26732  | 26366       | 46.3           |
|             | S2       | 76449       | 37869    | 36476    | 33199  | 32524       | 42.5           |
|             |          | 72299       | 34413    | 33214    | 29886  | 29244       | 40.4           |
|             |          | 91378       | 45607    | 44903    | 43011  | 41998       | 45.9           |
|             | S3       | 102589      | 52060    | 50303    | 44881  | 43001       | 41.9           |
|             |          | 44044       | 21737    | 21404    | 20754  | 20483       | 46.5           |
|             |          | 76657       | 38747    | 36959    | 32334  | 30890       | 40.3           |
|             | S4       | 73246       | 38030    | 36732    | 32274  | 30064       | 41.1           |
|             |          | 35502       | 18527    | 17867    | 16019  | 15610       | 43.9           |
|             |          | 109157      | 55046    | 53807    | 49180  | 47124       | 43.2           |
|             | S5       | 1502003     | 50952    | 49029    | 44478  | 43479       | 42.6           |
|             |          | 113003      | 57484    | 56340    | 52023  | 48842       | 43.2           |
|             |          | 96514       | 47651    | 45933    | 41774  | 40925       | 42.4           |
|             | S6       | 75312       | 37122    | 35494    | 32383  | 31607       | 41.9           |
|             |          | 72989       | 36117    | 34487    | 31799  | 31184       | 42.7           |
|             |          | 54316       | 27465    | 26158    | 23574  | 23004       | 42.3           |
|             | S7       | 73237       | 36635    | 35432    | 32586  | 32040       | 43.7           |
|             |          | 82199       | 42207    | 40697    | 37412  | 36667       | 44.6           |
|             |          | 78430       | 40639    | 39029    | 35811  | 35050       | 44.7           |
