# Supplementary material for: Phage-Host Prediction Using a Computational Tool Coupled with 16S rRNA Gene Amplicon Sequencing
Source: MDPI journal article supplement (doi:10.3390/v15010076), 2022-12-27
Supplement: s1 [file s1]

**Table S2.** Number of contigs retrieved after metagenomic analysis with the corresponding phages contigs identified with VIRSORTER (category 1,2 and 3) and VIBRANT in the sediment and water samples of the 7 stations (S1-S7)

| Stations     | Total contigs |        | Nb. of phage contigs identified with VIRSORTER |       | Nb. of phage contigs identified with VIBRANT |       |
|--------------|---------------|--------|------------------------------------------------|-------|----------------------------------------------|-------|
|              | Sediment      | Water  | Sediment                                       | Water | Sediment                                     | Water |
| <b>S1</b>    | 27058         | 68116  | 507                                            | 1841  | 839                                          | 2352  |
| <b>S2</b>    | 25471         | 147211 | 683                                            | 1717  | 896                                          | 2863  |
| <b>S3</b>    | 89161         | 136906 | 589                                            | 1238  | 1262                                         | 2113  |
| <b>S4</b>    | 61964         | 82840  | 489                                            | 1056  | 803                                          | 1710  |
| <b>S5</b>    | 23164         | 173    | 346                                            | 714   | 518                                          | 1029  |
| <b>S6</b>    | 125292        | 112680 | 616                                            | 1609  | 1252                                         | 2327  |
| <b>S7</b>    | 90986         | 102767 | 401                                            | 1507  | 952                                          | 2111  |
| <b>Total</b> | 443096        | 650693 | 3631                                           | 9682  | 6522                                         | 14505 |
