# Supplementary material for: Phage-Host Prediction Using a Computational Tool Coupled with 16S rRNA Gene Amplicon Sequencing
Source: MDPI journal article supplement (doi:10.3390/v15010076), 2022-12-27
Supplement: s1 [file s1]

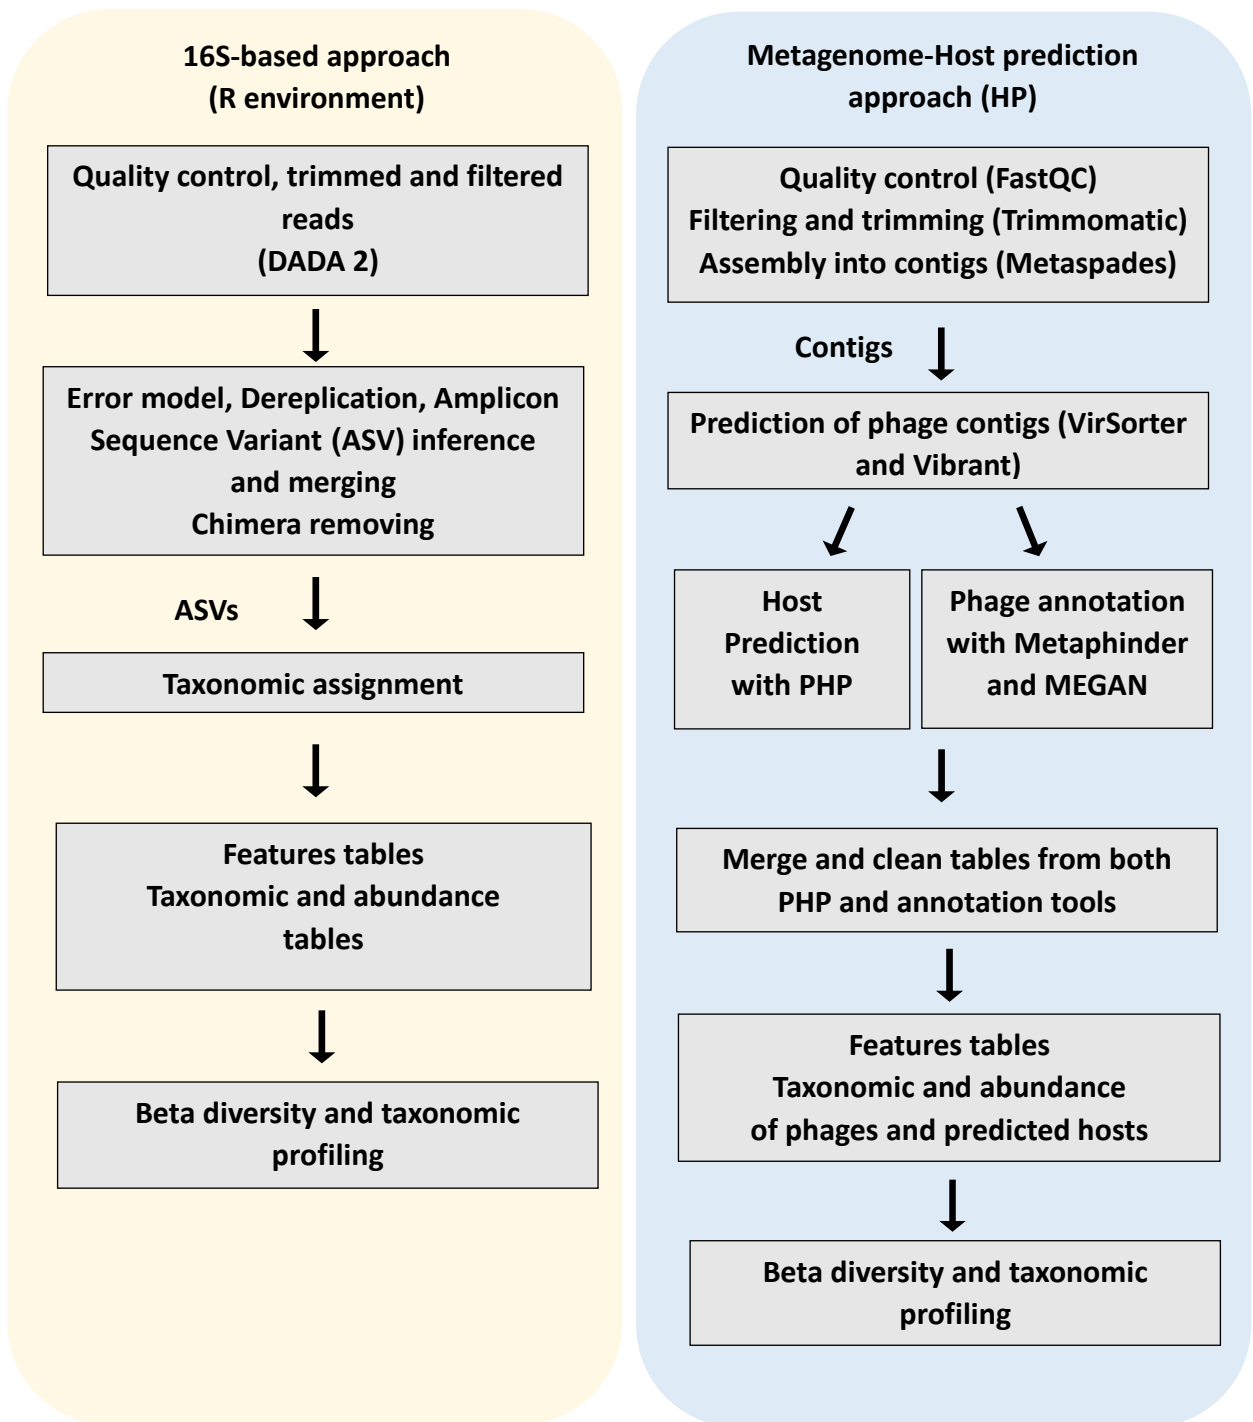

**Figure S1.** Flow chart representing the overview of 16S metabarcoding and host prediction analyses

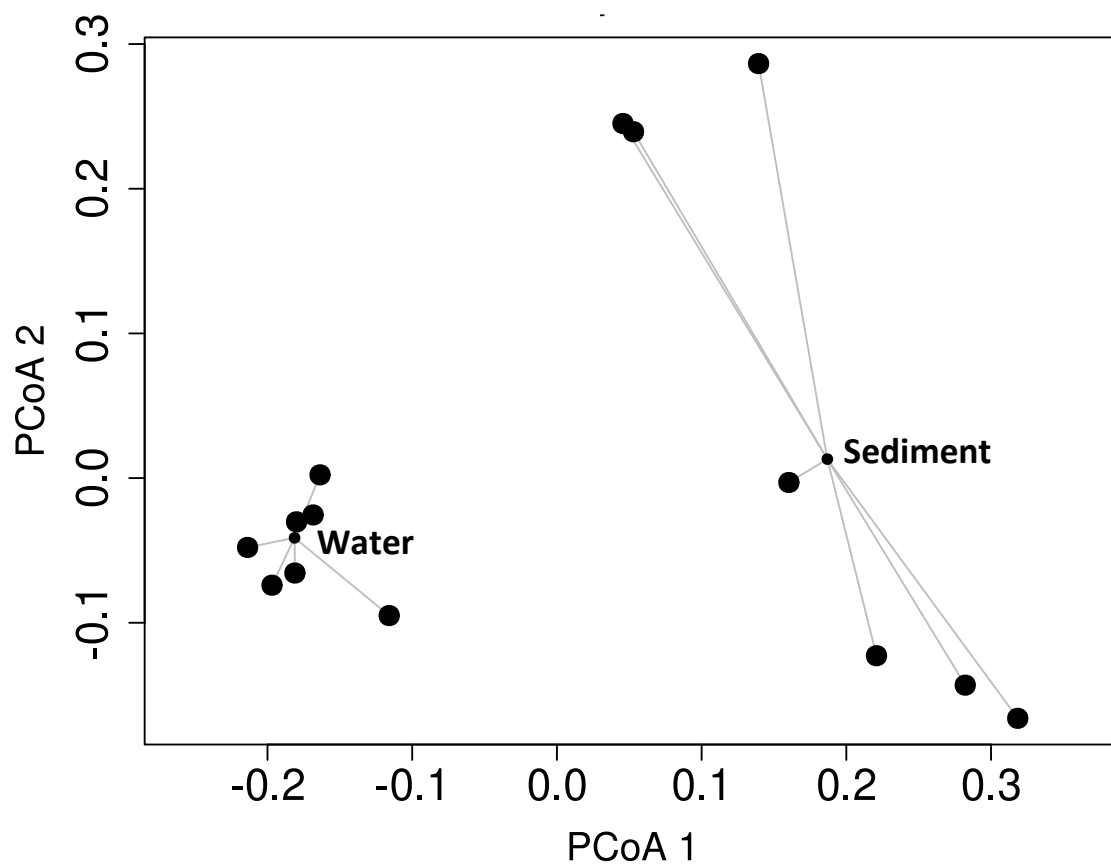

**Figure S2.** Principal coordinates plot (PCoA) representing the multivariate homogeneity of group dispersions (betadisper) in the water and sediment compartments. Each point represents a single station (seven per compartment). PCoA1 and PCoA2 are the first and second sort axes in the "betadisper" analysis, respectively.

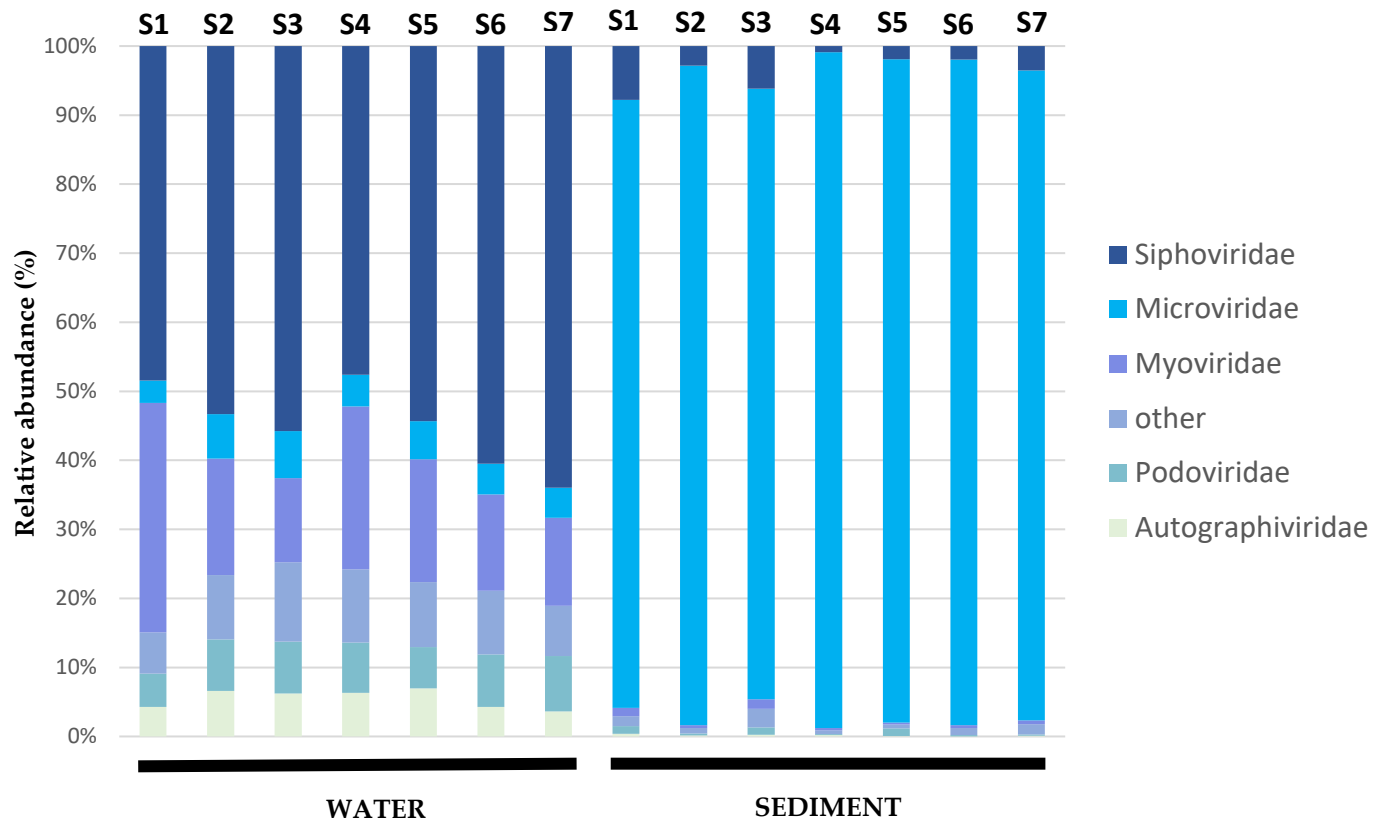

**Figure S3.** Bar plot showing the relative abundance (%) of the top 5 phage taxa at family level in the sediment and water samples of the seven stations (S1-S7). Viral families are represented by a color code.
